# Supplementary material
Source: PubMed Central journal article supplement (PMC5514395)
Supplement: id7b00017_si_001.pdf [file id7b00017_si_001.pdf]

## SUPPORTING INFORMATION

### **In vivo-selected pyrazinoic acid-resistant *M. tuberculosis* strains harbor missense mutations in the aspartate decarboxylase PanD and the unfoldase ClpC1**

Pooja Gopal<sup>†</sup>, Rokeya Tasneen<sup>‡</sup>, Michelle Yee<sup>†</sup>, Jean-Philippe Lanoix<sup>§</sup>, Jansy Sarathy<sup>||</sup>, George Rasic<sup>||</sup>, Liping Li<sup>||</sup>, Veronique Dartois<sup>||</sup>, Eric Nuermberger<sup>‡</sup>, Thomas Dick<sup>† #</sup>

<sup>†</sup>Department of Microbiology and Immunology, Yong Loo Lin School of Medicine, National University of Singapore, Republic of Singapore

<sup>‡</sup>Center for Tuberculosis Research, Johns Hopkins University, Baltimore, Maryland, USA

<sup>§</sup>Department of Infectious Diseases, University Hospital of Amiens-Picardie, Amiens, France

<sup>||</sup>Public Health Research Institute, New Jersey Medical School, Rutgers, The State University of New Jersey, Newark, New Jersey, USA

#### **CONTENTS:**

##### **Supplemental data:**

Figures S1-S2

Table S1-S2

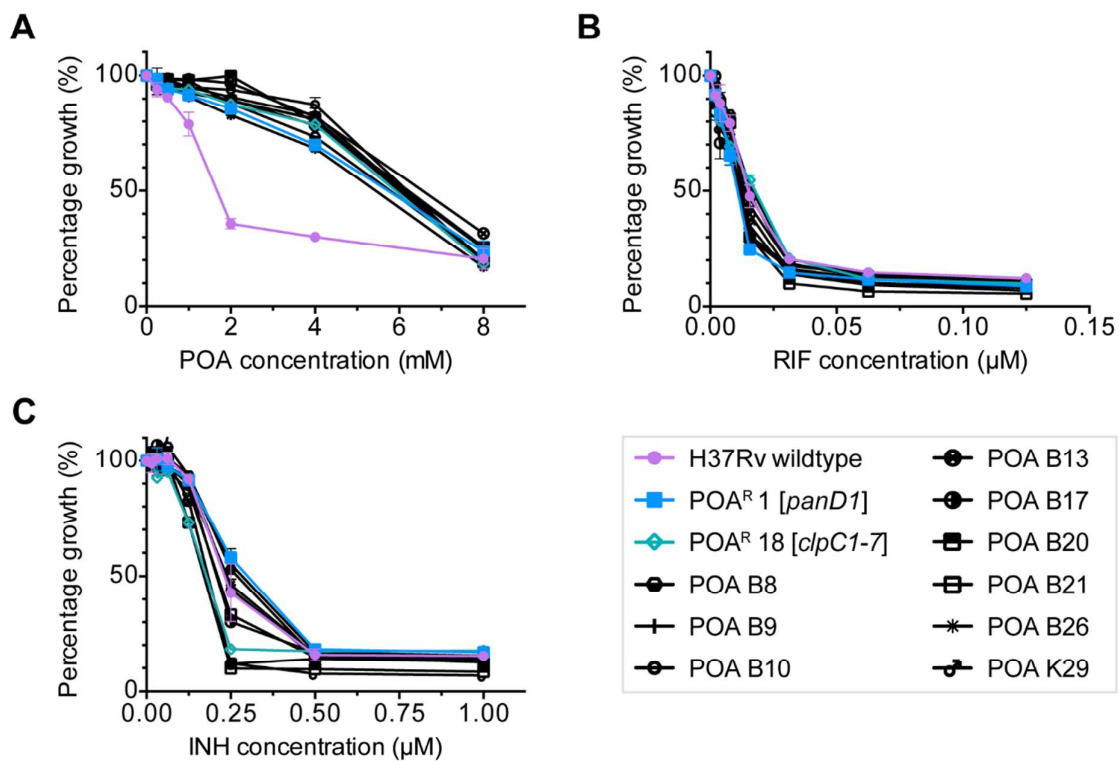

**FIGURE S1** Growth inhibition dose-response curves for nine POA-resistant *M. tuberculosis* strains selected in mice, representative POA-resistant strains selected in vitro: POA<sup>R</sup> 1 [*panD1*] described previously in (1) and POA<sup>R</sup> 18 [*clpC1-7*] described previously in (2), and the wild-type parent *M. tuberculosis* H37Rv strain for (A) POA, (B) rifampicin, RIF, and (C) isoniazid, INH. Experiments were carried out 3 times independently with technical replicates. Mean values and standard deviations from representative experiments are shown.

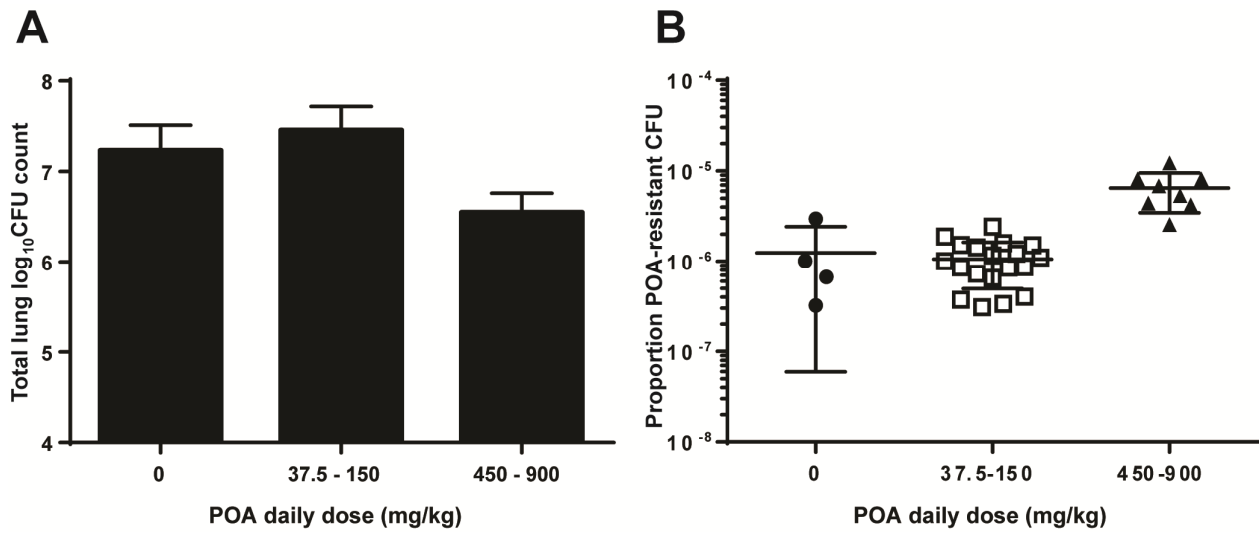

**FIGURE S2** Selection of POA-resistant mutants in vivo as a function of POA dose. (A) Mean ( $\pm$ SD) total lung CFU counts and (B) proportion of total lung CFU that are POA-resistant in individual mice after 8 weeks of treatment with the indicated dose of POA. In panel B, horizontal lines represent the mean and SD.

TABLE S1 Abundance of acid-fast bacilli within lesions after infection with POA-resistant mutants versus wild-type *M. tuberculosis* H37Rv

|          | <i>M. tuberculosis</i> H37Rv strain      |                                          |                                         |                                           |
|----------|------------------------------------------|------------------------------------------|-----------------------------------------|-------------------------------------------|
|          | Wild-type                                | POA <sup>R</sup> 1 [ <i>panD1</i> ]      | POA <sup>R</sup> 7 [ <i>ppsC1</i> ]     | POA <sup>R</sup> 18 [ <i>clpC1-7</i> ]    |
| Lesion 1 | 24 clusters (5 - 20 bacilli per cluster) | 37 clusters (5 - 20 bacilli per cluster) | 0                                       | 8 single bacilli                          |
| Lesion 2 | 23 clusters (5 - 20 bacilli per cluster) | 5 clusters (1 to 5 bacilli per cluster)  | 28 single bacilli                       | 21 clusters (1 to 5 bacilli per cluster)  |
| Lesion 3 | 22 clusters (5 - 20 bacilli per cluster) | 21 clusters (5 - 20 bacilli per cluster) | 5 clusters (1 to 6 bacilli per cluster) | 15 single bacilli                         |
| Lesion 4 | 36 clusters (5 - 20 bacilli per cluster) | 10 clusters (5 - 20 bacilli per cluster) | 0                                       | 13 clusters (2 to 20 bacilli per cluster) |
| Lesion 5 | 28 clusters (5 - 20 bacilli per cluster) | 20 clusters (5 - 20 bacilli per cluster) | 45 single bacilli                       | 8 clusters (2 to 5 bacilli per cluster)   |

TABLE S2 Phenotypic and genotypic characteristics of POA-resistant *M. tuberculosis* strains selected in mice.

| <i>M. tuberculosis</i><br>Strain name | Drug, dose (mg/kg) and<br>dosing frequency of<br>treatment regimen | Frequency of POA<br>(300 µg/mL) resistant<br>CFU after treatment | Mutations in <i>panD</i> | POA                                          |                               | PZA              |                               |
|---------------------------------------|--------------------------------------------------------------------|------------------------------------------------------------------|--------------------------|----------------------------------------------|-------------------------------|------------------|-------------------------------|
|                                       |                                                                    |                                                                  |                          | Broth MIC <sub>50</sub> <sup>a</sup><br>(mM) | Agar MIC <sup>b</sup><br>(mM) | S/R <sup>c</sup> | Agar MIC <sup>b</sup><br>(mM) |
| JHU WT <sup>d</sup>                   | -                                                                  | -                                                                | None                     | 1.5                                          | 1                             | S                | 2                             |
| POA B1 <sup>e</sup>                   | POA 450 twice daily Lung 1                                         | 0.0008163                                                        | G351A/ Met117Ile         | 6.0                                          | >4                            | R                | >4                            |
| POA B2 <sup>e</sup>                   | POA 450 twice daily Lung 2                                         | 0.0004233                                                        | G382T/ Ala128Ser         | 5.5                                          | >4                            | R                | >4                            |
| POA B3 <sup>e</sup>                   | POA 450 twice daily Lung 3                                         | 0.0006829                                                        | A349G/ Met117Val         | 6.0                                          | >4                            | R                | >4                            |
| POA B4 <sup>e</sup>                   | POA 450 twice daily Lung 4                                         | 0.0008130                                                        | C61A/ His21Asn           | 5.5                                          | >4                            | R                | >4                            |
| POA B5 <sup>e</sup>                   | POA 450 once daily Lung 1                                          | 0.0004412                                                        | C63A/ His21Gln           | 5.5                                          | >4                            | R                | >4                            |
| POA B7 <sup>e</sup>                   | POA 450 once daily Lung 4                                          | 0.0012222                                                        | C383A/ Ala128Glu         | 6.0                                          | >4                            | R                | >4                            |
| POA B8 <sup>d,e</sup>                 | POA 450 once daily Lung 5                                          | 0.0002564                                                        | None                     | 5.5                                          | >4                            | R                | >4                            |
| POA B9 <sup>d,e</sup>                 | POA 150 once daily Lung 1                                          | 0.0000308                                                        | A389G/ Glu130Gly         | 6.0                                          | >4                            | R                | >4                            |
| POA B10 <sup>d,e</sup>                | POA 150 once daily Lung 2                                          | 0.0000374                                                        | Δ 418T                   | 6.0                                          | >4                            | R                | >4                            |
| POA B11 <sup>e</sup>                  | POA 150 once daily Lung 3                                          | 0.0000652                                                        | T407C/ Leu136Pro         | 6.0                                          | >4                            | R                | >4                            |
| POA B12 <sup>e</sup>                  | POA 150 once daily Lung 4                                          | 0.0001104                                                        | G346T/ Asp116Tyr         | 5.5                                          | >4                            | R                | >4                            |
| POA B13 <sup>d,e</sup>                | POA 150 once daily Lung 5                                          | 0.0000730                                                        | None                     | 6.5                                          | >4                            | R                | >4                            |
| POA B14 <sup>e</sup>                  | POA 75 twice daily Lung 1                                          | 0.0000336                                                        | G412A/ Val138Met         | 6.0                                          | >4                            | R                | >4                            |
| POA B15 <sup>e</sup>                  | POA 75 twice daily Lung 2                                          | 0.0001429                                                        | T321A/ Phe107Leu         | 6.0                                          | >4                            | R                | >4                            |
| POA B16 <sup>e</sup>                  | POA 75 twice daily Lung 3                                          | 0.0001165                                                        | T392C/ Leu131Pro         | 6.0                                          | >4                            | R                | >4                            |
| POA B17 <sup>d,e</sup>                | POA 75 twice daily Lung 4                                          | 0.0000403                                                        | G351T/ Met117Ile         | 6.0                                          | >4                            | R                | >4                            |
| POA B18 <sup>e</sup>                  | POA 75 twice daily Lung 5                                          | 0.0001000                                                        | T407G/ Leu136Arg         | 6.0                                          | >4                            | R                | >4                            |
| POA B19 <sup>e</sup>                  | POA 75 once daily Lung 1                                           | 0.0001212                                                        | G376T/ Glu126Stop        | 6.0                                          | >4                            | R                | >4                            |

|                        |                            |               |                  |     |    |   |    |
|------------------------|----------------------------|---------------|------------------|-----|----|---|----|
| POA B20 <sup>d,e</sup> | POA 75 once daily Lung 2   | 0.0000851     | None             | 6.0 | >4 | R | >4 |
| POA B21 <sup>d,e</sup> | POA 75 once daily Lung 3   | 0.0001512     | None             | 6.0 | >4 | R | >4 |
| POA B22 <sup>e</sup>   | POA 75 once daily Lung 5   | 0.0002418     | T413C/ Val138Ala | 5.5 | >4 | R | >4 |
| POA B23 <sup>e</sup>   | POA 37.5 once daily Lung 1 | 0.0001593     | G382T/ Ala128Ser | 6.0 | >4 | R | >4 |
| POA B24 <sup>e</sup>   | POA 37.5 once daily Lung 2 | 0.0000857     | A343G/ Ile115Val | 6.0 | >4 | R | >4 |
| POA B25 <sup>e</sup>   | POA 37.5 once daily Lung 3 | 0.0001515     | G351C/ Met117Ile | 6.0 | >4 | R | >4 |
| POA B26 <sup>d,e</sup> | POA 37.5 once daily Lung 4 | 0.0000859     | T49C/ Cys17Arg   | 5.5 | >4 | R | >4 |
| POA B27 <sup>e</sup>   | POA 37.5 once daily Lung 5 | 0.0001882     | T413C/ Val138Ala | 6.0 | >4 | R | >4 |
| POA B28 <sup>e</sup>   | PZA 150 once daily Lung 3  | 0.0001709     | C381A/ Asn127Lys | 6.0 | >4 | R | >4 |
| POA K29 <sup>d,f</sup> | POA 450 twice daily Lung 9 | Not available | None             | 6.0 | >4 | R | >4 |

<sup>a</sup> MIC<sub>50</sub>, POA concentration that inhibits 50% of growth compared to drug free control. Drug susceptibility tests were carried out 3 times independently and mean values are shown.

<sup>b</sup> Maximum concentration of drug tested was 4 mM.

<sup>c</sup> BACTEC MGIT 960 test for susceptibility (S) or resistance (R) to 100 µg/mL PZA.

<sup>d</sup> Strains were subjected to whole genome sequencing. Polymorphisms detected in these strains are described in Table 1.

<sup>e</sup> Strains were isolated from BALB/c mice as described (3).

<sup>f</sup> Strain was isolated from a C3HeB/FeJ mouse as described (3).

1. Gopal, P., Yee, M., Sarathy, J., Low, J. L., Sarathy, J. P., Kaya, F., Dartois, V., Gengenbacher, M., and Dick, T. (2016) Pyrazinamide Resistance Is Caused by Two Distinct Mechanisms: Prevention of Coenzyme A Depletion and Loss of Virulence Factor Synthesis. *ACS Infect. Dis.* 2, 616-626. DOI: 10.1021/acsinfecdis.6b00070.
2. Yee, M., Gopal, P., and Dick, T. (2016) Missense mutations in the unfoldase ClpC1 of the caseinolytic protease complex are associated with pyrazinamide resistance in *Mycobacterium tuberculosis*. *Antimicrob. Agents Chemother.* DOI: 10.1128/aac.02342-16.
3. Lanoix, J.-P., Tasneen, R., O'Brien, P., Sarathy, J., Safi, H., Pinn, M., Alland, D., Dartois, V., and Nuermberger, E. (2016) High systemic exposure of pyrazinoic acid has limited anti-tuberculosis activity in murine and rabbit models of tuberculosis. *Antimicrob. Agents Chemother.* DOI: 10.1128/aac.03085-15.
